# Supplementary material for: Correlation of natural muscovite exfoliation with interlayer and solvation forces
Source: Royal Society of Chemistry journal article supplement (doi:10.1039/c6ra26560j), 2017-01-01
Supplement: c6ra26560j1.pdf [file c6ra26560j1.pdf]

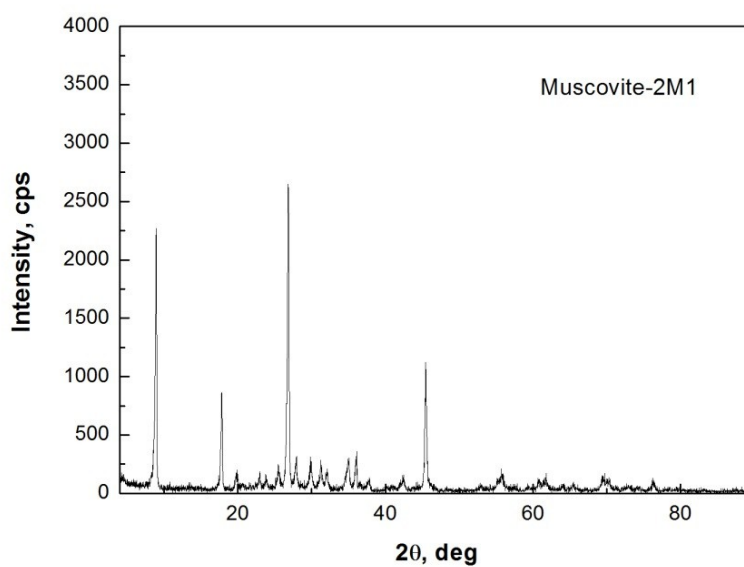

Figure S1. XRD of natural muscovite <sup>S1</sup>

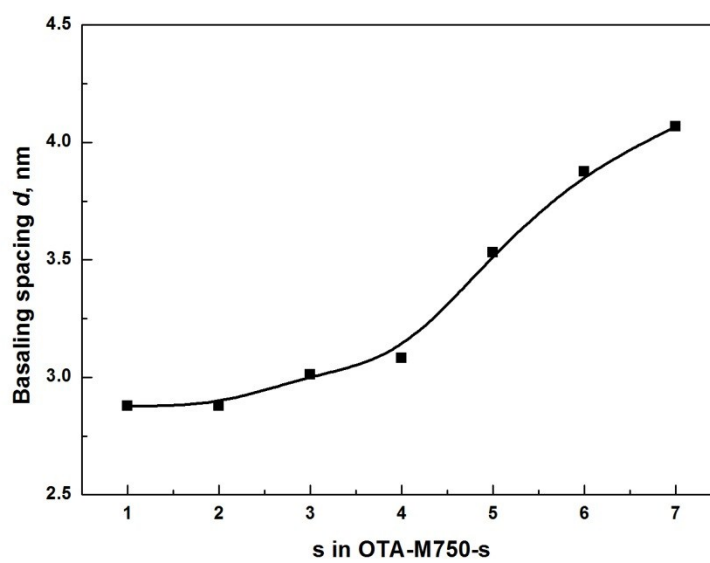

Figure S2. Basal spacing of OTA-M750-s

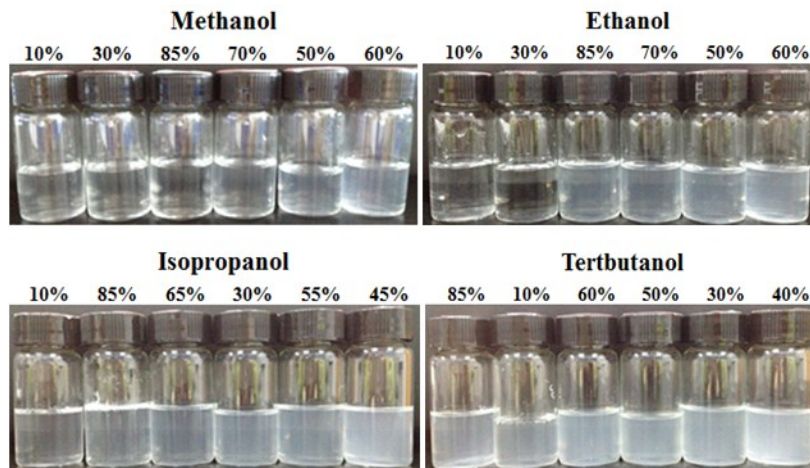

Figure S3. Exfoliated OTA-M750-7 in alcohol/water mixtures with different alcohol concentrations. The suspensions were stable for at least 2 months

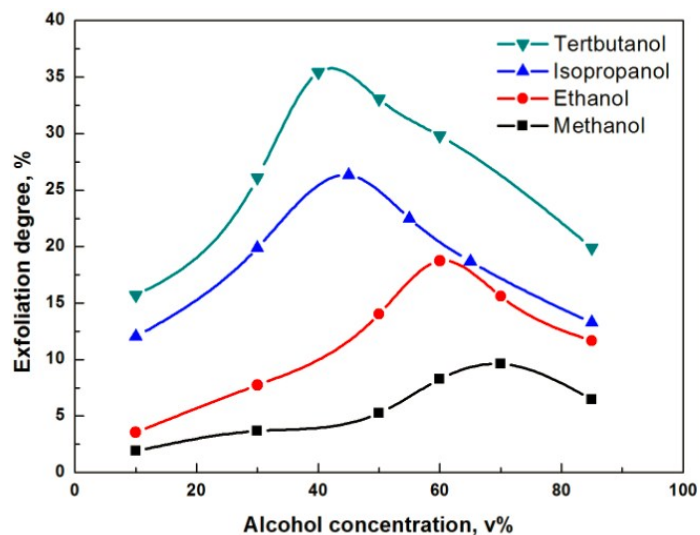

Figure S4. Exfoliation degree of OTA-M750-7 as a function of alcohol concentration in volume percentage

Table S1 Chemical composition of muscovite

| K(%)  | Na(%) | Ca(%) | Mg(%) | Fe(%) | Si(%)  | Al(%)  | Sn(%) | Ti(%) | O(%)   | Others(%) | Loss on ignition |
|-------|-------|-------|-------|-------|--------|--------|-------|-------|--------|-----------|------------------|
| 5.873 | 0.345 | 0.345 | 0.173 | 1.843 | 15.950 | 13.646 | 0.127 | 0.081 | 59.123 | 1.487     | 1.007            |

Note: loss on ignition was obtained from thermogravimetric analysis in the range from room temperature to 1100°C.

Table S2 Exfoliation degree of OTA-M750-s in 40% tertbutanol /water mixture

| Sample     | Absorbance of suspension before centrifugation | Absorbance of supernatant after centrifugation | Exfoliation degree (%) |
|------------|------------------------------------------------|------------------------------------------------|------------------------|
| OTA-M750-1 | 1.254                                          | 0.087                                          | 6.9378                 |

|            |       |       |         |
|------------|-------|-------|---------|
| OTA-M750-2 | 1.255 | 0.091 | 7.2501  |
| OTA-M750-3 | 1.257 | 0.107 | 8.5123  |
| OTA-M750-4 | 1.258 | 0.138 | 10.9698 |
| OTA-M750-5 | 1.258 | 0.284 | 22.5755 |
| OTA-M750-6 | 1.260 | 0.375 | 29.7619 |
| OTA-M750-7 | 1.263 | 0.447 | 35.3919 |

Table S3 Exfoliation degree of OTA-M750-7 in alcohol/water mixtures with different alcohol concentrations

| <b>Alcohol</b> | <b>Concentration (%)</b> | <b>Surface tension (mJ/m<sup>2</sup>)</b> | <b>Exfoliation degree (%)</b> |
|----------------|--------------------------|-------------------------------------------|-------------------------------|
| Methanol       | 10                       | 62.13                                     | 1.90093                       |
|                | 30                       | 46.12                                     | 3.67287                       |
|                | 50                       | 37.19                                     | 5.25938                       |
|                | 60                       | 32.7                                      | 8.2623                        |
|                | 70                       | 27.8                                      | 9.60533                       |
|                | 85                       | 23.8                                      | 6.44117                       |
| Ethanol        | 10                       | 51.46                                     | 3.54472                       |
|                | 30                       | 35.69                                     | 7.73481                       |
|                | 50                       | 28.55                                     | 14.0388                       |
|                | 60                       | 26.11                                     | 18.73116                      |
|                | 70                       | 25.44                                     | 15.6066                       |
|                | 85                       | 23.65                                     | 11.66296                      |
| Isopropanol    | 10                       | 50.08                                     | 12.00817                      |
|                | 30                       | 31.52                                     | 19.89256                      |
|                | 45                       | 25.57                                     | 26.33276                      |
|                | 55                       | 24.84                                     | 22.49922                      |
|                | 65                       | 24.55                                     | 18.69159                      |
|                | 85                       | 23.16                                     | 13.26236                      |
| Tertbutanol    | 10                       | 43.69                                     | 15.69507                      |
|                | 30                       | 28.65                                     | 26.09925                      |
|                | 40                       | 25.78                                     | 35.40773                      |
|                | 50                       | 25.54                                     | 33.04248                      |
|                | 60                       | 25.19                                     | 29.80453                      |
|                | 85                       | 24.04                                     | 19.89893                      |

Table S4  $\theta$  and basal spacing of sample OTA-M750-s

| <b>Sample</b> | <b><math>\theta</math> (°)</b> | <b>Basal spacing (nm)</b> |
|---------------|--------------------------------|---------------------------|
| OTA-M750-1    | 1.53                           | 2.8784                    |
| OTA-M750-2    | 1.53                           | 2.8786                    |
| OTA-M750-3    | 1.47                           | 3.01                      |
| OTA-M750-4    | 1.43                           | 3.0803                    |
| OTA-M750-5    | 1.25                           | 3.5308                    |

|            |      |        |
|------------|------|--------|
| OTA-M750-6 | 1.14 | 3.8743 |
| OTA-M750-7 | 1.09 | 4.0671 |

Bragg's equation:

$$n\lambda = 2d \sin \theta \quad \text{Eq. (S1)}$$

where  $d$  is the basal spacing, and  $\lambda$  is the wavelength of the incident X-ray beam,  $n$  is an integer, and  $\theta$  is the diffraction angle.

References:

- S1. F. Friedrich, S. Heissler, W. Faubel, R. Nuesch, P.G. Weidler, Cu(II)-intercalated muscovite: An infrared spectroscopic study, *Vibrational Spectroscopy*, 2007, **43**: 427-434.
